# Supplementary material
Source: PubMed Central journal article supplement (PMC2441648)
Supplement: NIHMS40521-supplement-04.pdf [file NIHMS40521-supplement-04.pdf]

Fig. S1

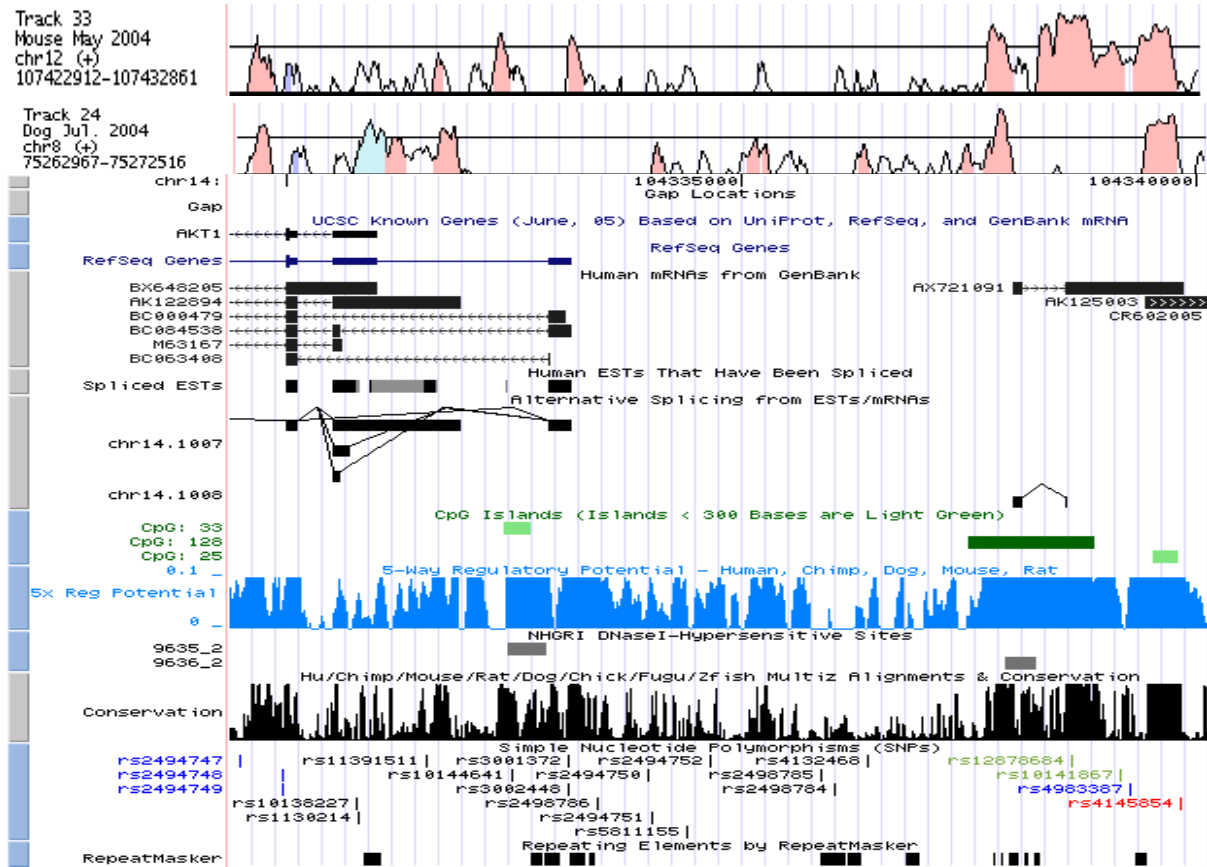

AKT1 mRNA NM\_005163 rs1130214 G/T SNP (code K)

```

>gi|62241010|ref|NM_005163.2| Homo sapiens v-akt murine thymoma viral
oncogene homolog 1 (AKT1), transcript variant 1, mRNA

TAATTATGGGTCTGTAACCACCCCTGGACTGGGTGCTCCTCACTGACGGACTTTGTCTGAACCTCTCTTTGT
STAT3
CTCCAGCGCCCAGCACTGGGCCTGGCAAACCTGAGACGCCCGGTACATGTTGGCCAAATGAATGAACCA
STAT3
GATTCAGACCGGCAGGGGCGCTGTGGTTTAGGAGGGGCTGGGGTTTCTCCAGGAGGTTTTTKGGCTTG
(-) E2FF/E2F.02 tccaAAAAcgcgaac
CGTGGAGGGCTCTGGACTCCCGTTTGCGCCAGTGGCCTGCATCCTGGTCCTGTCTTCCTCATGTTTGAA
TTTCTTTGCTTTTCTAGTCTGGGGAGCAGGGAGGAGCCCTGTGCCCTGTCCAGGATCCATGGGTAGGAA
CACCATGGACAGGGAGAGCAAACGGGGCCATCTGTACCAGGGGCTTAGGGAAGCCGAGCCAGCCCTGGG
STAT3
TCAAAGAAGTCAAAGGGGCTGCCTGGAGGAGGCAGCCTGTGACCTGGTGCATC/intron 1/AGAGGCT
GTGGCCAGGCCAGCTGGGCTCGGGGAGCGCCAGCCTGAGAGGAGCGCGTGAGCGTCGCGGGAGCCTCGGG
CACCATGAGCGACGTGGCTATTGTGAAGGAGGGTTGGCTGCACAAACGAGGGGAGTACATCAAGACCTG
.....

```
